# Supplementary material
Source: HighWire-hosted journal article supplement (https://www.cmaj.ca/highwire/filestream/74395/field_highwire_adjunct_files/0/190580-com-1-at.pdf)
Supplement: 190580-com-1-at.pdf [file 190580-com-1-at.pdf]

## Appendix 1 (as submitted by the authors): Appropriate Use of Antipsychotics (AUA) project

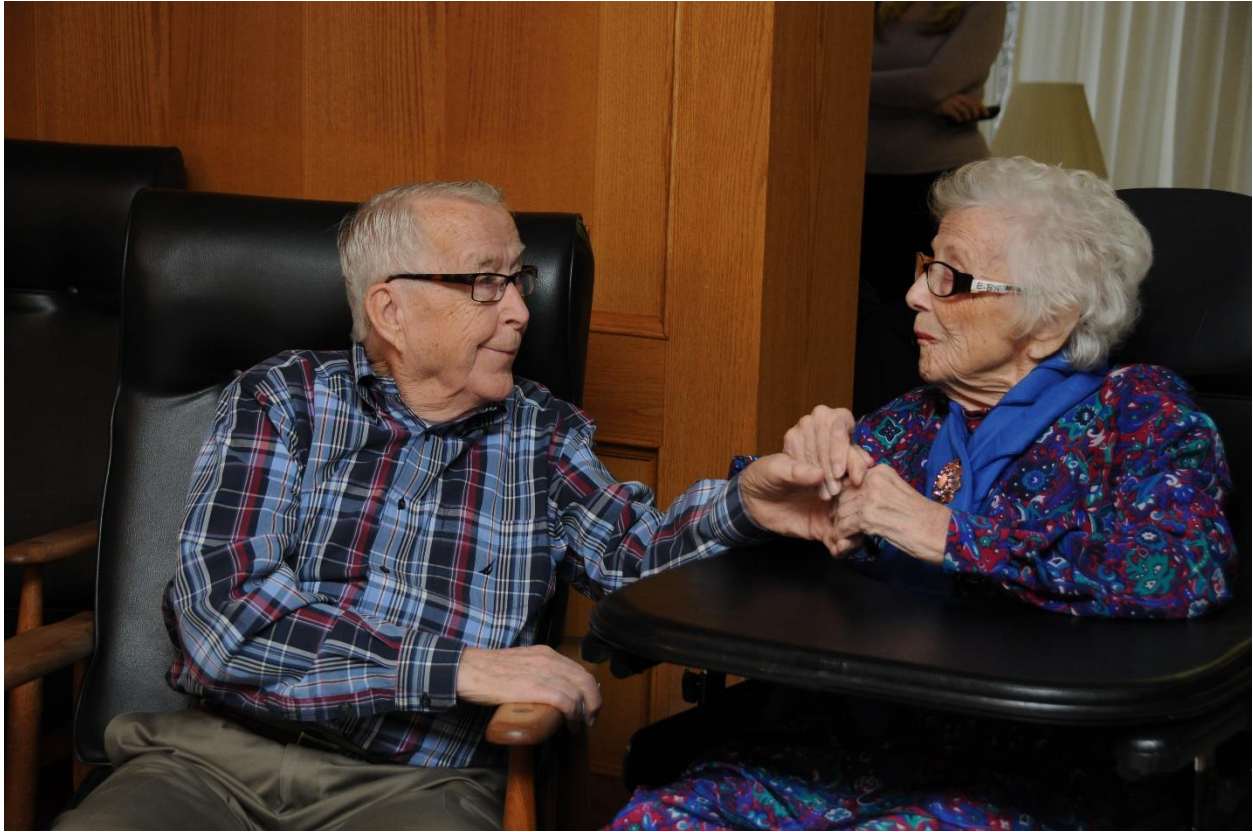

Evelyn was one of the first residents to have her antipsychotics reduced as part of the AUA project. Her husband Marshall noticed she was more alert, regained her sense of humour, and “her eyes sparkle again.”
